# Supplementary material
Source: publisher site journal article supplement (https://www.dovepress.com/article/288788)
Supplement: Supplementary file 1 [file get_supplementary_file.php]

**Table1** Primer sequences used for clonal PCR and mutant PCR.

| Target | Primer sequences (5’-3’) |
| --- | --- |
| USF1-Wt | F: 5'-CAGGAGCAACAGCCTAATC-3' |
|  | R: 5'-CAGGAGCAACAGCCTAATC-3' |
| USF1-Mut | F: 5'-CAGGAGCAACAGCCTAATC-3' |
|  | R: 5'-TTAATCCAAGTCCACATTGTGTGTTTCACACCAC-3' |
| PCGF3-Wt | F: 5'-GGTGGCATTGGGTTGGAC-3' |
|  | R: 5'-ACCTGGAGGGTGAGGGAGAC-3' |
| PCGF3-Mut | F: 5'-GGTGGCATTGGGTTGGAC-3' |
|  | R: 5'-CCAAGCTTGGGAAGCATAGCCATTGCCCGCACCCTGTCCCGTA-3' |
| oe-USF1 | F: 5'-CTCACAGAGAGATGAAGG-3’ |
|  | R: 5'-TGAATCCCCATAGTTAGT-3’ |

F, forward; R, reverse
